# Supplementary material for: Potential of desorption electrospray ionization and paper spray ionization with high-resolution mass spectrometry for the screening of sports doping agents in urine
Source: Royal Society of Chemistry journal article supplement (doi:10.1039/d2ay01687g), 2022-11-30
Supplement: d2ay01687g1.pdf [file d2ay01687g1.pdf]

## Potential of desorption electrospray ionization and paper spray ionization with high-resolution mass spectrometry for the screening of sports doping agents in urine

Claudia Bressan<sup>(a)</sup>, Raquel Seró<sup>(b)</sup>, Élida Alechaga<sup>(a,c)</sup>, Nuria Monfort<sup>(a)</sup>, Encarnación Moyano<sup>(b)\*</sup>, Rosa Ventura<sup>(a)</sup>

*(a) Catalanian Antidoping Laboratory, Doping Control Research Group, IMIM (Hospital del Mar Medical Research Institute), Barcelona, Doctor Aiguader 88, 08003 Barcelona, Spain*

*(b) Department of Chemical Engineering and Analytical Chemistry, University of Barcelona, Av. Diagonal 645, 08028 Barcelona, Spain*

*(c) Department of Experimental and Health Sciences, Universitat Pompeu Fabra, Doctor Aiguader 88, 08003 Barcelona, Spain*

\*Corresponding author:

Encarnación Moyano

*Department of Chemical Engineering and Analytical Chemistry, University of Barcelona*

*Av. Diagonal 645, 08028 Barcelona, Spain*

Tel: +34 934039277

Fax: +34 934021233

E-mail: encarna.moyano@ub.edu

## Supplementary Information

**Table S1.** Diagnostic ions used in full scan for screening all tested analytes in both DESI and PSI.

| Stimulant           | Formula                                                        | Diagnostic ions ( <i>m/z</i> and assignment)                                                                                       |
|---------------------|----------------------------------------------------------------|------------------------------------------------------------------------------------------------------------------------------------|
| amfepramone         | C <sub>13</sub> H <sub>19</sub> NO                             | 206.1539 [M+H] <sup>+</sup> ; 188,1434 [M+H-H <sub>2</sub> O] <sup>+</sup>                                                         |
| amiphenazole        | C <sub>9</sub> H <sub>9</sub> N <sub>3</sub> S                 | 192.0590 [M+H] <sup>+</sup>                                                                                                        |
| amphetamine         | C <sub>9</sub> H <sub>13</sub> N                               | 136.1121 [M+H] <sup>+</sup> ; 119.0855 [M+H-NH <sub>3</sub> ] <sup>+</sup> ; 91.0542 [C <sub>7</sub> H <sub>7</sub> ] <sup>+</sup> |
| benfluorex          | C <sub>19</sub> H <sub>20</sub> NO <sub>2</sub> F <sub>3</sub> | 352.1519 [M+H] <sup>+</sup> ; 335.1254 [M+H-NH <sub>3</sub> ] <sup>+</sup>                                                         |
| benzoylecgonine     | C <sub>16</sub> H <sub>19</sub> NO <sub>4</sub>                | 290.1387 [M+H] <sup>+</sup> ; 312.1206 [M+Na] <sup>+</sup>                                                                         |
| benzphetamine       | C <sub>17</sub> H <sub>21</sub> N                              | 240.1747 [M+H] <sup>+</sup>                                                                                                        |
| benzylpiperazine    | C <sub>11</sub> H <sub>16</sub> N <sub>2</sub>                 | 177.1386 [M+H] <sup>+</sup>                                                                                                        |
| caffeine            | C <sub>8</sub> H <sub>10</sub> N <sub>4</sub> O <sub>2</sub>   | 195.0877 [M+H] <sup>+</sup>                                                                                                        |
| carphedon           | C <sub>12</sub> H <sub>14</sub> N <sub>2</sub> O <sub>2</sub>  | 219.1128 [M+H] <sup>+</sup>                                                                                                        |
| chlorphentermine    | C <sub>10</sub> H <sub>14</sub> NCl                            | 184.0888 [M+H] <sup>+</sup> ; 148.1121 [M+H-HCl] <sup>+</sup>                                                                      |
| clobenzorex         | C <sub>16</sub> H <sub>18</sub> NCl                            | 260.1201 [M+H] <sup>+</sup> ; 277.1466 [M+NH <sub>4</sub> ] <sup>+</sup>                                                           |
| cropropamide        | C <sub>13</sub> H <sub>24</sub> N <sub>2</sub> O <sub>2</sub>  | 241.1911 [M+H] <sup>+</sup> ; 258.2176 [M+NH <sub>4</sub> ] <sup>+</sup>                                                           |
| crotetamide         | C <sub>12</sub> H <sub>22</sub> N <sub>2</sub> O <sub>2</sub>  | 249.1574 [M+Na] <sup>+</sup> ; 265.1313 [M+K] <sup>+</sup> ; 227.1754 [M+H] <sup>+</sup>                                           |
| cyclazodone         | C <sub>12</sub> H <sub>12</sub> N <sub>2</sub> O <sub>2</sub>  | 217.0972 [M+H] <sup>+</sup> ; 239.0791[M+Na] <sup>+</sup>                                                                          |
| dobutamine          | C <sub>18</sub> H <sub>23</sub> NO <sub>3</sub>                | 302.1751 [M+H] <sup>+</sup>                                                                                                        |
| ephedrine           | C <sub>10</sub> H <sub>15</sub> NO                             | 166.1226 [M+H] <sup>+</sup> ; 148.1116 [M+H-H <sub>2</sub> O] <sup>+</sup>                                                         |
| etafedrine          | C <sub>12</sub> H <sub>19</sub> NO                             | 194.1539 [M+H] <sup>+</sup> ; 176.1434 [M+H-H <sub>2</sub> O] <sup>+</sup>                                                         |
| ethylamphetamine    | C <sub>11</sub> H <sub>17</sub> N                              | 164.1434 [M+H] <sup>+</sup>                                                                                                        |
| famprofazone        | C <sub>24</sub> H <sub>31</sub> N <sub>3</sub> O               | 378.2540 [M+H] <sup>+</sup>                                                                                                        |
| fenbutrazate        | C <sub>23</sub> H <sub>29</sub> NO <sub>3</sub>                | 368.2220 [M+H] <sup>+</sup>                                                                                                        |
| fencamfamin         | C <sub>15</sub> H <sub>21</sub> N                              | 216.1747 [M+H] <sup>+</sup> ; 199.1481 [M+H-NH <sub>3</sub> ] <sup>+</sup>                                                         |
| fencamine           | C <sub>20</sub> H <sub>28</sub> N <sub>6</sub> O <sub>2</sub>  | 385.2347 [M+H] <sup>+</sup> ; 407.2166 [M+Na] <sup>+</sup>                                                                         |
| fenetylline         | C <sub>18</sub> H <sub>23</sub> N <sub>5</sub> O <sub>2</sub>  | 342.1925 [M+H] <sup>+</sup>                                                                                                        |
| fenfluramine        | C <sub>12</sub> H <sub>16</sub> NF <sub>3</sub>                | 232.1308 [M+H] <sup>+</sup> ; 249.1573 [M+NH <sub>4</sub> ] <sup>+</sup>                                                           |
| fenproporex         | C <sub>12</sub> H <sub>16</sub> N <sub>2</sub>                 | 189.1386 [M+H] <sup>+</sup> ; 172.1121[M+H-NH <sub>3</sub> ] <sup>+</sup>                                                          |
| furfenorex          | C <sub>15</sub> H <sub>19</sub> NO                             | 230.1539 [M+H] <sup>+</sup>                                                                                                        |
| heptaminol          | C <sub>8</sub> H <sub>19</sub> NO                              | 146.1539 [M+H] <sup>+</sup> ;128.1434 [M+H-H <sub>2</sub> O] <sup>+</sup>                                                          |
| isometheptene       | C <sub>9</sub> H <sub>19</sub> N                               | 142.1590 [M+H] <sup>+</sup>                                                                                                        |
| MDEA                | C <sub>12</sub> H <sub>17</sub> NO <sub>2</sub>                | 208.1332 [M+H] <sup>+</sup>                                                                                                        |
| MDMA                | C <sub>11</sub> H <sub>15</sub> NO <sub>2</sub>                | 194.1176 [M+H] <sup>+</sup> ; 163.0748 [M+H-CH <sub>3</sub> NH <sub>2</sub> ] <sup>+</sup>                                         |
| mefenorex           | C <sub>12</sub> H <sub>18</sub> NCl                            | 212.1201 [M+H] <sup>+</sup> ; 176.1434 [M+H-HCl] <sup>+</sup>                                                                      |
| mephentermine       | C <sub>11</sub> H <sub>17</sub> N                              | 164.1434 [M+H] <sup>+</sup>                                                                                                        |
| methamphetamine(d-) | C <sub>10</sub> H <sub>15</sub> N                              | 150.1277 [M+H] <sup>+</sup>                                                                                                        |
| methoxyphenamine    | C <sub>11</sub> H <sub>17</sub> NO                             | 180.1383 [M+H] <sup>+</sup>                                                                                                        |
| methylephedrine     | C <sub>11</sub> H <sub>17</sub> NO                             | 180.1383 [M+H] <sup>+</sup> ; 162.1277 [M+H-H <sub>2</sub> O] <sup>+</sup>                                                         |
| methylhexaneamine   | C <sub>7</sub> H <sub>17</sub> N                               | 116.1434 [M+H] <sup>+</sup>                                                                                                        |
| nikethamide         | C <sub>10</sub> H <sub>14</sub> N <sub>2</sub> O               | 179.1179 [M+H] <sup>+</sup> ;196.1444 [M+NH <sub>4</sub> ] <sup>+</sup>                                                            |
| norfenfluramine     | C <sub>10</sub> H <sub>12</sub> NF <sub>3</sub>                | 204.0995 [M+H] <sup>+</sup>                                                                                                        |
| norpseudoephedrine  | C <sub>9</sub> H <sub>13</sub> NO                              | 152.1070 [M+H] <sup>+</sup> ; 134.0964 [M+H-H <sub>2</sub> O] <sup>+</sup> ; 135.0804 [M+H-NH <sub>3</sub> ] <sup>+</sup>          |
| octopamine          | C <sub>8</sub> H <sub>11</sub> NO <sub>2</sub>                 | 136.0757 [M+H-H <sub>2</sub> O] <sup>+</sup> ; 154.0863 [M+H] <sup>+</sup>                                                         |
| phenmetrazine       | C <sub>11</sub> H <sub>15</sub> NO                             | 178.1226 [M+H] <sup>+</sup>                                                                                                        |
| phentermine         | C <sub>10</sub> H <sub>15</sub> N                              | 150.1277 [M+H] <sup>+</sup> ; 133.1012 [M+H-NH <sub>3</sub> ] <sup>+</sup>                                                         |

|                                 |                                                                              |                                                                                              |
|---------------------------------|------------------------------------------------------------------------------|----------------------------------------------------------------------------------------------|
| <i>p</i> -Hydroxyamphetamine    | C <sub>9</sub> H <sub>13</sub> NO                                            | 152.1070 [M+H] <sup>+</sup> ; 134.0964 [M+H-H <sub>2</sub> O] <sup>+</sup>                   |
| <i>p</i> -Hydroxymetamphetamine | C <sub>10</sub> H <sub>15</sub> NO                                           | 166.1226 [M+H] <sup>+</sup>                                                                  |
| pipradol                        | C <sub>18</sub> H <sub>21</sub> NO                                           | 268.1696 [M+H] <sup>+</sup> ; 250.1590 [M+H-H <sub>2</sub> O] <sup>+</sup>                   |
| <i>p</i> -Methylamphetamine     | C <sub>10</sub> H <sub>15</sub> N                                            | 150.1277 [M+H] <sup>+</sup>                                                                  |
| prenylamine                     | C <sub>24</sub> H <sub>27</sub> N                                            | 330.2216 [M+H] <sup>+</sup>                                                                  |
| prolintane                      | C <sub>15</sub> H <sub>23</sub> N                                            | 218.1903 [M+H] <sup>+</sup>                                                                  |
| propylhexedrine                 | C <sub>10</sub> H <sub>21</sub> N                                            | 156.1747 [M+H] <sup>+</sup>                                                                  |
| sibutramine                     | C <sub>17</sub> H <sub>26</sub> NCl                                          | 280.1827 [M+H] <sup>+</sup> ; 244.2060 [M+H-HCl] <sup>+</sup> ; 302.1646 [M+Na] <sup>+</sup> |
| strychnine                      | C <sub>21</sub> H <sub>22</sub> N <sub>2</sub> O <sub>2</sub>                | 335.1754 [M+H] <sup>+</sup>                                                                  |
| tuaminoheptane                  | C <sub>7</sub> H <sub>17</sub> N                                             | 116.1434 [M+H] <sup>+</sup>                                                                  |
| <b>Diuretic</b>                 | <b>Formula</b>                                                               | <b>Diagnostic ions (<i>m/z</i> and assignment)</b>                                           |
| chlortalidone                   | C <sub>14</sub> H <sub>11</sub> N <sub>2</sub> O <sub>4</sub> ClS            | 337.0055 [M-H] <sup>-</sup> ; 372.9822 [M+Cl] <sup>-</sup>                                   |
| furosemide                      | C <sub>12</sub> H <sub>11</sub> N <sub>2</sub> O <sub>5</sub> ClS            | 329.0004 [M-H] <sup>-</sup>                                                                  |
| hydrochlorothiazide             | C <sub>7</sub> H <sub>8</sub> N <sub>3</sub> O <sub>4</sub> ClS <sub>2</sub> | 295.9572 [M-H] <sup>-</sup> ; 331.9339 [M+Cl] <sup>-</sup>                                   |

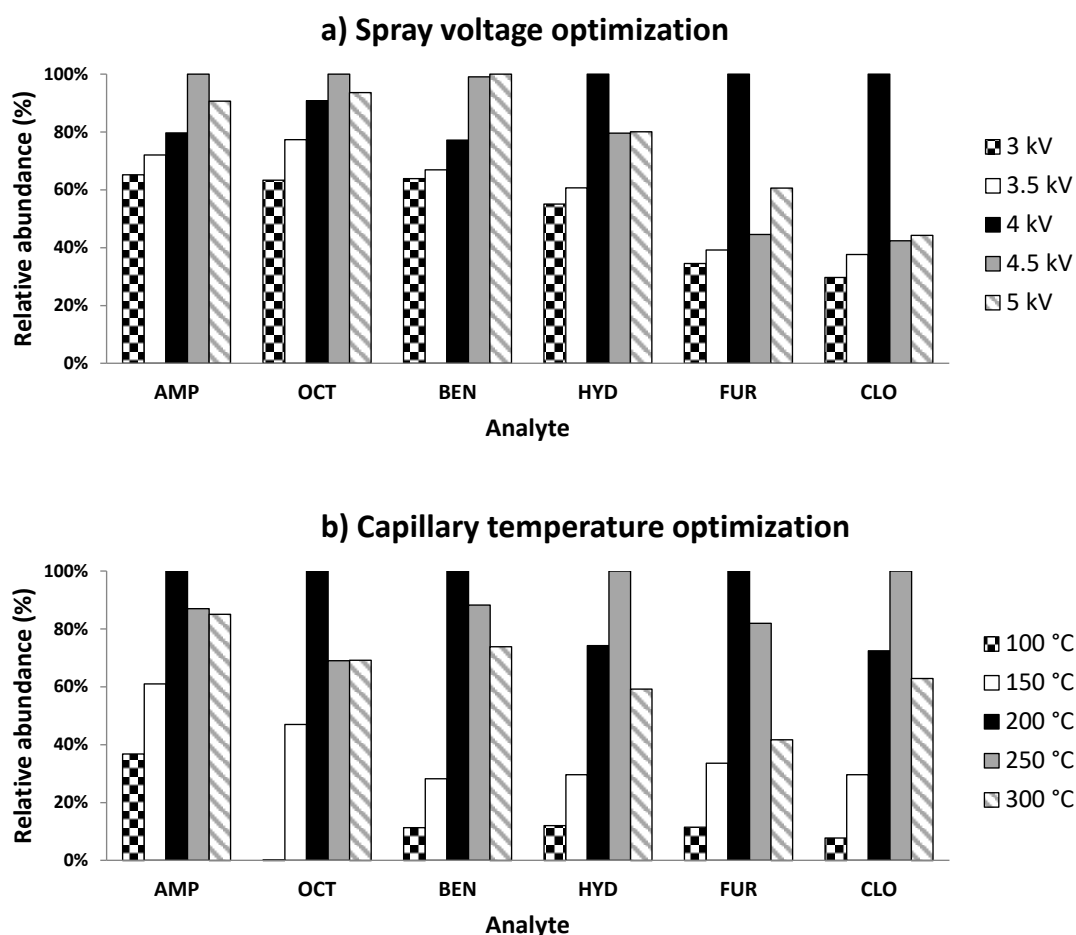

**Figure S1:** Optimization of a) the spray voltage and b) the capillary temperature in DESI-HRMS for three stimulants and three diuretics: amphetamine (AMP), octopamine (OCT), benzoylecgonine (BEN), hydrochlorothiazide (HYD), furosemide (FUR) and chlortalidone (CLO)

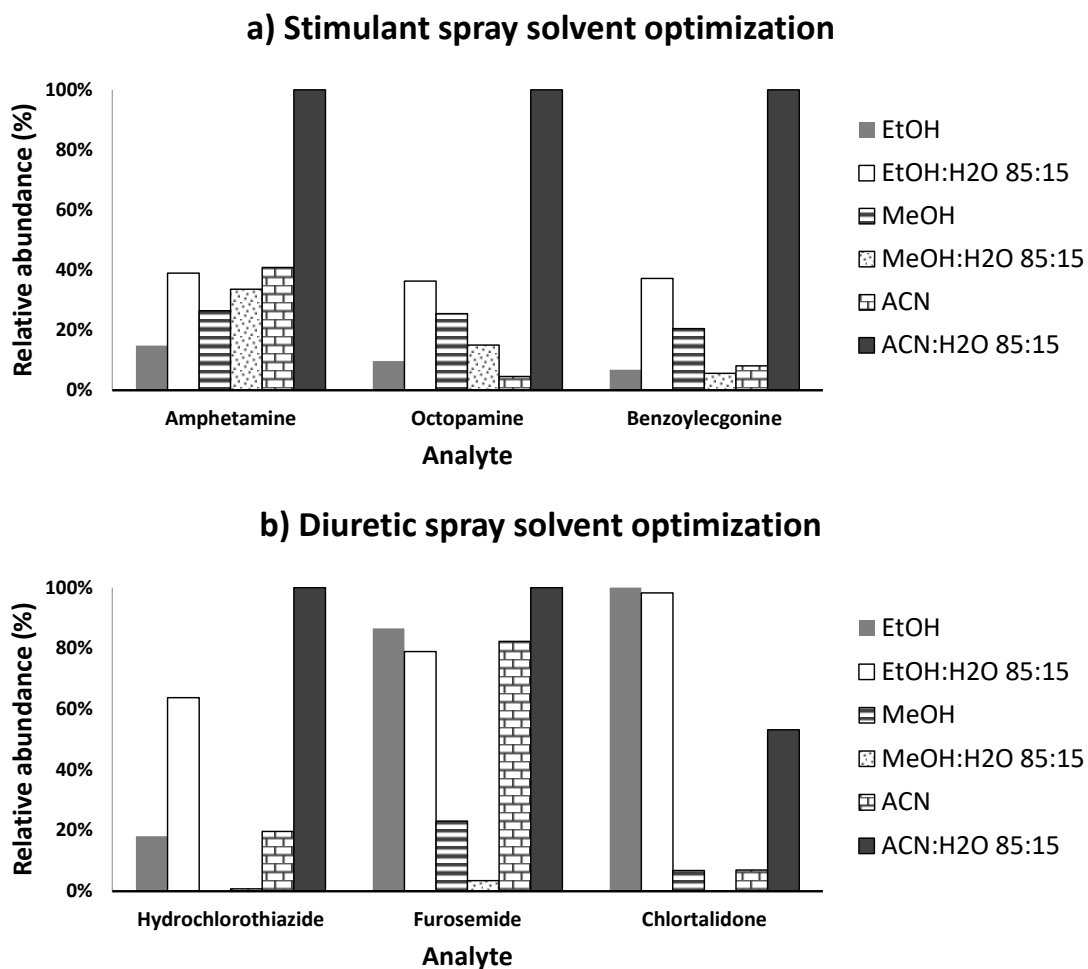

**Figure S2:** Effect of the spray solvent composition in the PSI ion abundances of selected a) stimulants and b) diuretics

**Table S2:** Optimum spray voltages set for the pure solvents and for the hydro-organic mixtures tested in PSI. The optimization was performed in both positive and negative modes.

|                             | <b>PSI (+)</b>      | <b>PSI (-)</b>      |
|-----------------------------|---------------------|---------------------|
| <b>Solvent</b>              | <b>Voltage (kV)</b> | <b>Voltage (kV)</b> |
| MeOH:H <sub>2</sub> O 85:15 | 3                   | 3                   |
| EtOH:H <sub>2</sub> O 85:15 | 3.5                 | 3                   |
| ACN:H <sub>2</sub> O 85:15  | 4.5                 | 3                   |
| MeOH                        | 3                   | 3.5                 |
| EtOH                        | 3                   | 3                   |
| ACN                         | 4.5                 | 4                   |
